# Supplementary material
Source: PubMed Central journal article supplement (PMC2747601)
Supplement: NIHMS131993-supplement-suppfig.pdf [file NIHMS131993-supplement-suppfig.pdf]

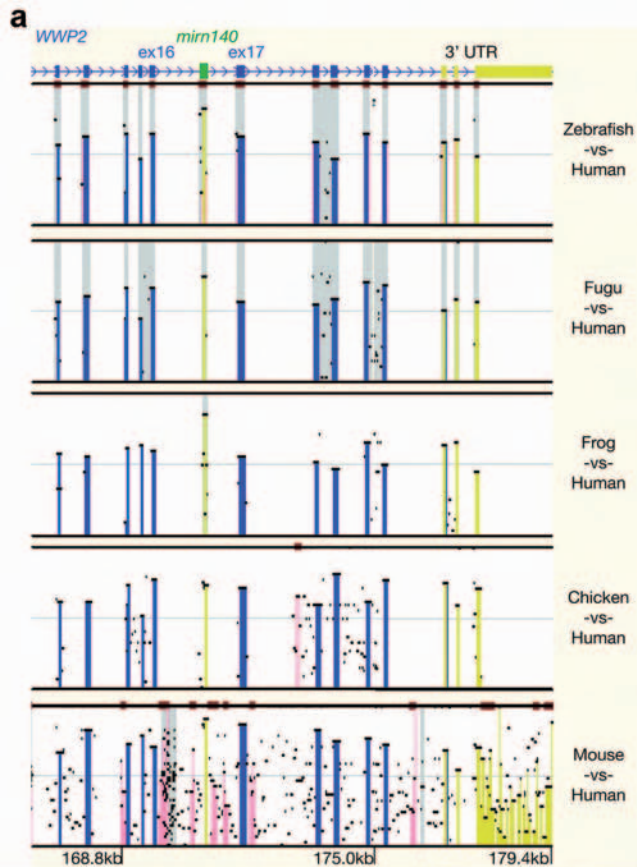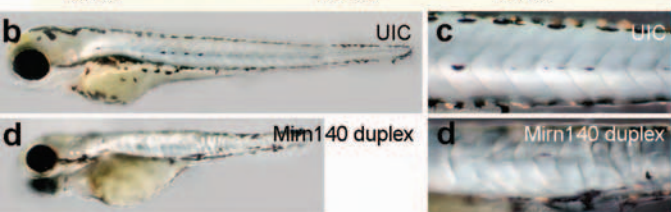

Supplementary Figure 1. Vertebrate genomes have mirn140 in the orthologous intron of the orthologous gene and Mirn140 overexpression causes somite and body axis defects. (a) Human *mirn140* lies in the intron between exon 16 and 17 of *WWP2* (OTTHUMG00000073640, NM\_199423), which encodes a WW domain containing E3 ubiquitin protein ligase 2. Genomic sequences of the *WWP2* orthologs from various vertebrates were aligned by Zpicture plots (<http://zpicture.dcode.org>) to display regions of sequence similarity. Percent nucleotide identity over a 100 bp sliding window is plotted on the vertical axis comparing the indicated species with regard to a 13 kb portion of the human *WWP2* gene. Along the top herringbone line, blue rectangles show the positions of exons in the human gene; the green rectangle shows the position of the human *mirn140*; and the yellow rectangles show the 3' untranslated region (UTR). The plots show that *mirn140* and exon structure are conserved in the *WWP2* ortholog of zebrafish (*Danio rerio*, ENSDARG00000061345), fugu pufferfish (*Takifugu rubripes*, SINFRUT00000158314), frog (*Xenopus tropicalis*, ENSXETG00000017879), chicken (*Gallus gallus*, ENSGALG00000000699), and mouse (*Mus musculus*, ENSMUSG000000031930), which has substantial additional conservation of non-coding genomic regions with human. (b-e) At 72 hpf, compared to uninjected controls (b,c), fish injected with Mirn140 duplex showed shortened body length (d) and disrupted somites (e), phenotypes that are also present in mouse *Pdgfra* mutants.

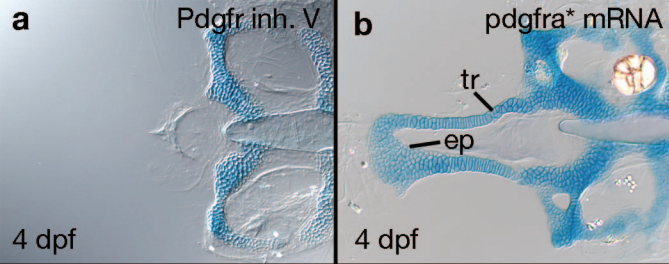

Supplementary Figure 2. *b1059* is a mutant allele of *pdgfra*. (a) Inhibition of Pdgf receptor signaling phenocopies the cleft palate phenotype of *b1059* mutants. (b) Injection of *pdgfra* mRNA into *b1059* mutants rescues the palatal skeleton.

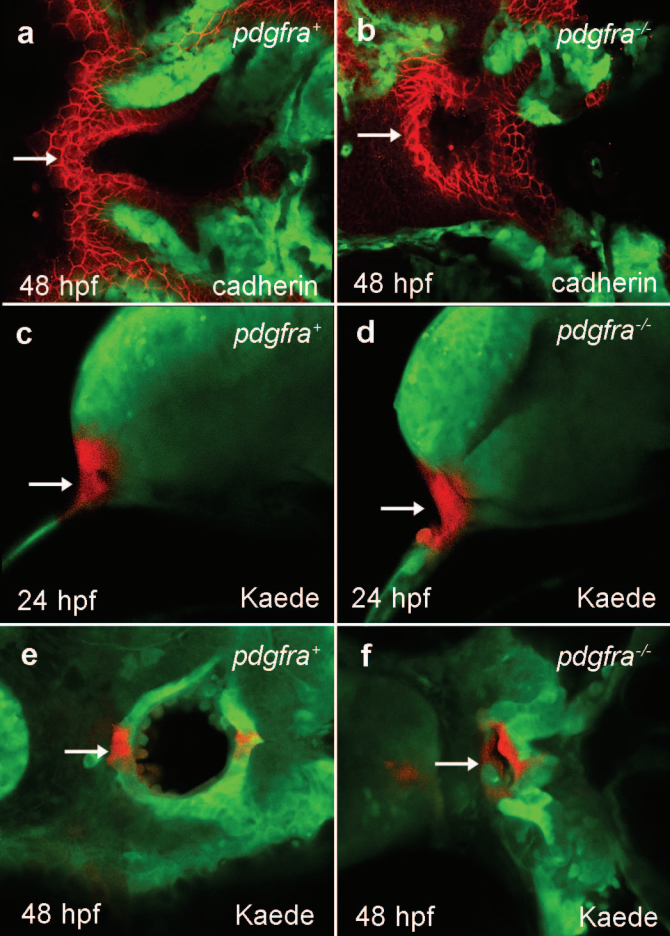

Supplementary Figure 3. The roof of the oral ectoderm is present in *pdgfra* mutants. (a,b) Anti-pan-cadherin antibody in *fli1:EGFP* transgenic embryos staining demonstrates an epithelium is present at the roof of the mouth in *pdgfra*<sup>+</sup> (a) and *pdgfra*<sup>-/-</sup> embryos (b). (c-f) Kaede photoconversion demonstrates that the 24 hpf fate map of the upper lip is not altered in *pdgfra*<sup>-/-</sup> embryos. Photoconversion of the anterior-most ectoderm at 24 hpf (c,d) labels the upper (arrow) and lower lips at 48 hpf (e,f) in *pdgfra*<sup>+</sup> (c,e) and *pdgfra*<sup>-/-</sup> (d,f) embryos.

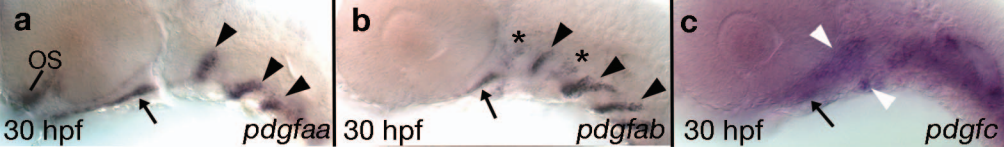

Supplementary Figure 4. Facial epithelia express ligands for Pdgfra as crest cells are condensing in the pharyngeal arches. (a-c) Lateral views of 30 hpf wild-type embryos stained with riboprobe to *pdgfaa* (a), *pdgfab* (b), or *pdgfc* (c). All ligands are expressed in the oral ectoderm (arrows), although the expression of *pdgfab* appears restricted to the oral ectoderm posterior to the eye. Expression of *pdgfaa* also labels the optic stalk (os). Transcripts for both *pdgfaa* and *pdgfab* are detected in the pharyngeal endoderm (a,b black arrowheads) and *pdgfab* is expressed in the arch mesodermal core (b, asterisks). The surface ectoderm overlying the first pharyngeal arch expresses *pdgfc* (c, white arrowhead).

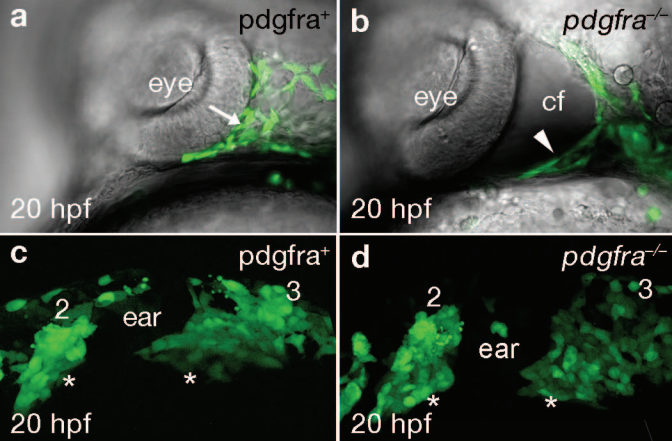

Supplementary Figure 5. Many crest cells reach their targets in *pdgfra* mutants. (a,b) Merged confocal fluorescent and DIC images of migratory neural crest cells in *pdgfra*<sup>+</sup> (a) and *pdgfra*<sup>-/-</sup> (b) embryos. (a) Crest cells migrating behind the eye to reach the oral ectoderm normally fill the region immediately posterior to the eye (arrow). (b) In *pdgfra* mutants, however, neural crest cells do not enter this cell-free region posterior to the eye (cf), although a small subset of neural crest reach the oral ectoderm by a circuitous route (arrowhead). (c,d) Lateral views of the second and third neural crest streams in *sox10:EGFP* transgenic *pdgfra*<sup>+</sup> (c) and *pdgfra*<sup>-/-</sup> (d) embryos. The migration of second and third neural crest streams, anterior and posterior of the ear, respectively, into the pharyngeal arches is normal in *pdgfra* mutants. The asterisks indicate the ventral limit of each pharyngeal arch.

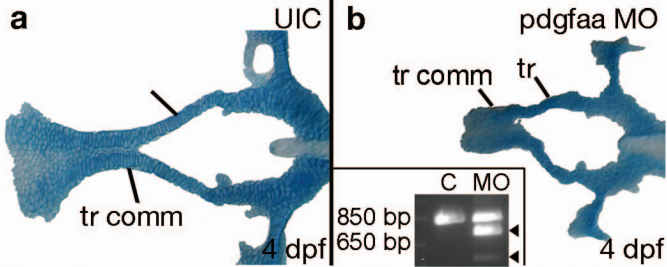

Supplementary Figure 6. The ethmoid plate is lost in *pdgfaa* morpholino injected embryos. Flat mounted 4 dpf palatal skeleton from control (a) and *pdgfaa* morpholino-injected (b) embryos. In *pdgfaa* morpholino injected embryos, the trabeculae (tr) extend to the midline, forming the trabecular communis (tr comm), but the ethmoid plate (ep) is lost. In 8% of embryos (n=37) the palatal skeleton was clefted (data not shown), similar to *pdgfra* mutants. (b, inset) Injection of *pdgfaa* morpholino disrupts splicing of *pdgfaa* RNA. The morpholino targets the intron 2/exon 3 boundary and the approximately 750 bp major splice variant observed is the size predicted following loss of exon three.

Supplementary table 1. Predicted Mirn140 (miR-140) binding sites in the 3' UTR of various vertebrate *pdgfra* orthologs

| Species                                | <i>mirn140</i> (miR-140)  | Mature Mirn140 sequence     | <i>pdgfra</i> gene   | 1 <sup>st</sup> Predicted Target Site                                                             | 2 <sup>nd</sup> Predicted Target site                                              |
|----------------------------------------|---------------------------|-----------------------------|----------------------|---------------------------------------------------------------------------------------------------|------------------------------------------------------------------------------------|
| <i>Danio rerio</i><br>zebrafish        | <b>dre-miR-140</b> ①      | 5' CAGUGGUUUUACCCUAUGGUAG3' | ENSDART00000011915 ② | GAUGGUAUCCCAUUUUGGUGAC<br>: :            <br>GAGCUAUAAG-AAAACCACUA<br>422-442 ③                   |                                                                                    |
| <i>Takifugu rubripes</i><br>pufferfish | <b>fru-miR-140</b>        | 5' CAGUGGUUUUACCCUAUGGUAG3' | SINFRUT00000170924   | GAUGGUAUCCCA-----UUUUGGUGAC<br>    : :                <br>CAAUCAUACGGUACAUAGUUAACCACUA<br>343-370 | GAUGGUAUCCCAUUUUGGUGAC<br>  :      : :     <br>CUGCCUCC-AGCUGUGCCACUG<br>1057-1077 |
| <i>Xenopus tropicalis</i><br>Frog      | <b>xtr-miR-140</b>        | 5' AGUGGUUUUACCCUAUGGUAG3'  | ENSXETG00000021035   | GAUGGUAUCCCA-UUUUGGUGAC<br>: : :            <br>UUACUCAAGCAUAAAACCACUU<br>464-486                 | GAUGGUAUCCCAUUUUGGUGAC<br>  : :        : : : <br>CUAUUGCAGGAUUUGCCAUG<br>1195-1216 |
| <i>Gallus gallus</i><br>Chicken        | <b>gga-miR-140</b>        | 5' AGUGGUUUUACCCUAUGGUAG3'  | ENSGALT00000009189   | GAUGGUAUCCCAUUUUGGUGAC<br>:                <br>UGCUCACAGAGAAAACCACUU<br>57-78                     | GAUGGUAUCCCA-UUUUGGUGAC<br>:                <br>UGAAGAACAUGCAAAAACCACUC<br>502-524 |
| <i>Mus musculus</i><br>Mouse           | <b>mmu-miR-140</b>        | 5' CAGUGGUUUUACCCUAUGGUAG3' | ENSMUST00000000476   | GAUGGUAUCCCAUUUUGGUGAC<br>                 <br>GAUAACCUUAAGAAAACCACUU<br>43-64                    | GAUGGUAUCCCAUUUUGGUGAC<br>:                <br>UGAAGUACAUGCAAAAACCACUU<br>488-509  |
| <i>Rattus norvegicus</i><br>Rat        | <b>rno-miR-140</b>        | 5' AGUGGUUUUACCCUAUGGUAG3'  | ENSRNOT00000003077   | GAUGGUAUCCCAUUUUGGUGAC<br>                 <br>GAUCCCUUAAGAAAACCACUU<br>47-68                     | GAUGGUAUCCCAUUUUGGUGAC<br>:                <br>UGAAGUACAUGCAAAAACCACUU<br>480-501  |
| <i>Canis familiaris</i><br>Dog         | <b>ENSCAFG00000020455</b> | 5' CAGUGGUUUUACCCUAUGGUAG3' | ENSCAFT00000003270   | GAUGGUAUCCCAUUUUGGUGAC<br>                 <br>GAUCCCUUAAGAAAACCACUU<br>50-71                     | GAUGGUAUCCCAUUUUGGUGAC<br>:                <br>UGAAGUACAUGCAAAAACCACUU<br>492-513  |
| <i>Pan troglodytes</i><br>chimpanzee   | <b>ptr-miR-140</b>        | 5' AGUGGUUUUACCCUAUGGUAG3'  | ENSPTRT00000029945   | GAUGGUAUCCCAUUUUGGUGAC<br>                 <br>GAUCCCGUUCAGAAAACCACUU<br>45-66                    | GAUGGUAUCCCAUUUUGGUGAC<br>                 : <br>AGAAGUGCAUGAAAACCAUUU<br>486-507  |
| <i>Homo sapiens</i><br>Human           | <b>hsa-miR-140</b>        | 5' AGUGGUUUUACCCUAUGGUAG3'  | ENST00000381354      | GAUGGUAUCCCAUUUUGGUGAC<br>                 <br>GAUCCCGUUCAGAAAACCACUU<br>44-66                    | GAUGGUAUCCCAUUUUGGUGAC<br>                 : <br>AGAAGUGCAUGAAAACCAUUU<br>487-508  |

① Green indicates *mirn140*. ② Yellow indicates *pdgfra*, with predicted Mirn140 binding sites in the 3'UTR (5' to left, 3' to right). Prediction programs: MicroInspector (<http://mirna.imbb.forth.gr/microinspector>)<sup>1</sup> and miRBase (<http://microrna.sanger.ac.uk/targets/v4>)<sup>2</sup>. ③ Position of first and last nucleotides of the predicted *miR-140* binding site in 3'UTR of *pdgfra* gene counted from after the stop codon.

1. Rusinov, V., Baev, V., Minkov, I.N. & Tabler, M. MicroInspector: a web tool for detection of miRNA binding sites in an RNA sequence. *Nucleic Acids Res* **33**, W696-700 (2005).
2. Griffiths-Jones, S. miRBase: the microRNA sequence database. *Methods Mol Biol* **342**, 129-38 (2006).

Supplementary table 2. Oligo sequences.

|              | Oligo name                          | Sequence                                                                 |
|--------------|-------------------------------------|--------------------------------------------------------------------------|
| PCR primers  | dCAP-F                              | 5'-TGTCTCCAAGGAAGCGTG-3'                                                 |
|              | dCAP-R                              | 5'-ACCGAGAGAGAAGATCTCCATAACTAG-3'                                        |
|              | pdgfraUTR-F                         | 5'-TCTGCGTCATCTTGTCACTTTTCTTCAC-3'                                       |
|              | pdgfraUTR-R                         | 5'-AACACAGCCATTTTCTTCATTTTAGGAC-3'                                       |
|              | nog3UTR-F                           | 5'-GAAATAAGCTCCGCACTCATCCTCACAT-3'                                       |
|              | nog3UTR-R                           | 5'-TCCATTCCCCTTATATTTACAGCACACCA-3'                                      |
|              | pdgfraF-F                           | 5'-TCATGTTCCCGGTGCTGCC-3'                                                |
|              | pdgfraF-R                           | 5'-GGGCTCCATAAGACTGAGGTGAAG-3'                                           |
|              | pdgfaaP-F                           | 5'-TGGGACACTTTTGACCACAGG-3'                                              |
|              | pdgfaaP-R                           | 5'-TCGTTTTTCAGGCTGTCGTTG-3'                                              |
|              | pdgfabP-F                           | 5'-TGACATTGGAAGGAGATGAGAACC-3'                                           |
|              | pdgfabP-R                           | 5'-TTATTGAATATCCTTGTTGATCAGTGC-3'                                        |
|              | pdgfcP-F                            | 5'-CCAAATGATTCCGTTGCTTCTG-3'                                             |
|              | pdgfcP-R                            | 5'-GCGTCTTCTCTCTGGGACTGATT-3'                                            |
|              | primirn140-F                        | 5'-GCAAGTCAAACCCTGTAGCATCCCGTT-3'                                        |
| primirn140-R | 5'-GCGAGCCGATAGAGCGATTGTTT-3'       |                                                                          |
| MO oligos    | <i>mirn140</i> MO (mature)          | 5'-CTACCATAGGGTAAAACCACTG-3';                                            |
|              | <i>mirn140</i> MO (Dicer inhibitor) | 5'-GACGTAACCTACCATAGGGTAAAACCACTGA-3'                                    |
|              | <i>pdgfaa</i> I1E2                  | 5' GGAATTGGTGCTTCCTGTAAAGA 3'                                            |
|              | <i>pdgfaa</i> I2E3                  | 5' CCTCCAGCACTTCATTCTCTGCAAC                                             |
|              | <i>p53</i> MO                       | 5'-GCGCCATTGCTTTGCAAGAATTG-3'                                            |
| RNA oligos   | Mirn140                             | 5'-CAGUGGUUUUACCCUAUGGUAG-3'                                             |
|              | Mirn140 mismatch                    | 5'-CACACCAAGAACCCUAUGGUAG-3'                                             |
|              | Mirn140*                            | 5'-UACCACAGGGUAGAACCACGGAC-3'                                            |
| LNA oligo    | <i>mirn140-LNA</i>                  | 5'-CtACcATaGGgTAaAAcAcTG-3'<br>(lowercase nucleotides represent LNA nts) |
